# Supplementary material for: Eveningness in Energy Intake among Adolescents with Implication on Anthropometric Indicators of Nutritional Status: The CRO-PALS Longitudinal Study
Source: MDPI journal article supplement (doi:10.3390/nu12061710), 2020-06-07
Supplement: s1 [file s1]

## SUPPLEMENTARY DATA

Table S1. Spearman's rank correlation coefficient for male population at the age of 15/16.

| Variables         | EV    | WHR   | BMI   | S4SF  | AEE <sub>sd</sub> |
|-------------------|-------|-------|-------|-------|-------------------|
| EV                | 1     | -0.05 | 0.004 | -0.07 | 0.02              |
| WHR               | -0.05 | 1     | 0.39  | 0.31  | 0.03              |
| BMI               | 0.004 | 0.39  | 1     | 0.77  | 0.03              |
| S4SF              | -0.07 | 0.31  | 0.77  | 1     | -0.09             |
| AEE <sub>sd</sub> | 0.02  | 0.03  | 0.03  | -0.09 | 1                 |

EV = eveningness in energy intake. WHR = waist to hip ratio. BMI = body mass index. S4SF = sum of 4 skinfolds. AEE<sub>sd</sub> = active energy expenditure during school days.

Table S2. Spearman's rank correlation coefficient for male population at the age of 18/19.

| Variables         | EV    | WHR   | BMI   | S4SF  | AEE <sub>sd</sub> |
|-------------------|-------|-------|-------|-------|-------------------|
| EV                | 1     | -0.06 | -0.11 | -0.11 | -0.07             |
| WHR               | -0.06 | 1     | 0.37  | 0.27  | 0.08              |
| BMI               | -0.11 | 0.37  | 1     | 0.69  | 0.17              |
| S4SF              | -0.11 | 0.27  | 0.69  | 1     | -0.02             |
| AEE <sub>sd</sub> | -0.07 | 0.08  | 0.17  | -0.02 | 1                 |

EV = eveningness in energy intake. WHR = waist to hip ratio. BMI = body mass index. S4SF = sum of 4 skinfolds. AEE<sub>sd</sub> = active energy expenditure during school days.

Table S3. Spearman's rank correlation coefficient for female population at the age of 15/16.

| Variables         | EV    | WHR   | BMI   | S4SF  | AEE <sub>sd</sub> |
|-------------------|-------|-------|-------|-------|-------------------|
| EV                | 1     | -0.17 | -0.04 | -0.05 | -0.01             |
| WHR               | -0.17 | 1     | 0.19  | 0.24  | -0.04             |
| BMI               | -0.04 | 0.19  | 1     | 0.83  | 0.03              |
| S4SF              | -0.05 | 0.24  | 0.83  | 1     | -0.03             |
| AEE <sub>sd</sub> | -0.01 | -0.04 | 0.03  | -0.03 | 1                 |

EV = eveningness in energy intake. WHR = waist to hip ratio. BMI = body mass index. S4SF = sum of 4 skinfolds. AEE<sub>sd</sub> = active energy expenditure during school days.

Table S4. Spearman's rank correlation coefficient for female population at the age of 18/19.

| Variables         | EV     | WHR   | BMI    | S4SF  | AEE <sub>sd</sub> |
|-------------------|--------|-------|--------|-------|-------------------|
| EV                | 1      | 0.02  | -0.01  | -0.05 | -0.004            |
| WHR               | 0.02   | 1     | 0.23   | 0.20  | -0.04             |
| BMI               | -0.01  | 0.23  | 1      | 0.79  | -0.003            |
| S4SF              | -0.05  | 0.20  | 0.79   | 1     | -0.04             |
| AEE <sub>sd</sub> | -0.004 | -0.04 | -0.003 | -0.04 | 1                 |

EV = eveningness in energy intake. WHR = waist to hip ratio. BMI = body mass index. S4SF = sum of 4 skinfolds. AEE<sub>sd</sub> = active energy expenditure during school days.

**Table S5.** Statistical significance of correlation (p-values) between variables in male population at the age of 15/16.

| Variables         | EV   | WHR                    | BMI                    | S4SF                  | AEE <sub>sd</sub> |
|-------------------|------|------------------------|------------------------|-----------------------|-------------------|
| EV                | /    | 0.37                   | 0.94                   | 0.23                  | 0.77              |
| WHR               | 0.37 | /                      | $3.21 \times 10^{-12}$ | $4.72 \times 10^{-8}$ | 0.65              |
| BMI               | 0.94 | $3.21 \times 10^{-12}$ | /                      | 0                     | 0.56              |
| S4SF              | 0.23 | $4.72 \times 10^{-8}$  | 0                      | /                     | 0.12              |
| AEE <sub>sd</sub> | 0.77 | 0.65                   | 0.56                   | 0.12                  | /                 |

EV = eveningness in energy intake. WHR = waist to hip ratio. BMI = body mass index. S4SF = sum of 4 skinfolds. AEE<sub>sd</sub> = active energy expenditure during school days.

**Table S6.** Statistical significance of correlation (p-values) between variables in male population at the age of 18/19.

| Variables         | EV   | WHR                    | BMI                    | S4SF                  | AEE <sub>sd</sub> |
|-------------------|------|------------------------|------------------------|-----------------------|-------------------|
| EV                | /    | 0.29                   | 0.06                   | 0.05                  | 0.25              |
| WHR               | 0.29 | /                      | $1.93 \times 10^{-11}$ | $2.09 \times 10^{-6}$ | 0.17              |
| BMI               | 0.06 | $1.93 \times 10^{-11}$ | /                      | 0                     | 0.002             |
| S4SF              | 0.05 | $2.09 \times 10^{-6}$  | 0                      | /                     | 0.73              |
| AEE <sub>sd</sub> | 0.25 | 0.17                   | 0.002                  | 0.73                  | /                 |

EV = eveningness in energy intake. WHR = waist to hip ratio. BMI = body mass index. S4SF = sum of 4 skinfolds. AEE<sub>sd</sub> = active energy expenditure during school days.

**Table S7.** Statistical significance of correlation (p-values) between variables in female population at the age of 15/16.

| Variables         | EV    | WHR                   | BMI                   | S4SF                  | AEE <sub>sd</sub> |
|-------------------|-------|-----------------------|-----------------------|-----------------------|-------------------|
| EV                | /     | 0.002                 | 0.53                  | 0.37                  | 0.83              |
| WHR               | 0.002 | /                     | $7.02 \times 10^{-4}$ | $3.34 \times 10^{-5}$ | 0.45              |
| BMI               | 0.53  | $7.02 \times 10^{-4}$ | /                     | 0                     | 0.54              |
| S4SF              | 0.37  | $3.34 \times 10^{-5}$ | 0                     | /                     | 0.55              |
| AEE <sub>sd</sub> | 0.83  | 0.45                  | 0.54                  | 0.55                  | /                 |

EV = eveningness in energy intake. WHR = waist to hip ratio. BMI = body mass index. S4SF = sum of 4 skinfolds. AEE<sub>sd</sub> = active energy expenditure during school days.

**Table S8.** Statistical significance of correlation (p-values) between variables in female population at the age of 18/19.

| Variables         | EV   | WHR                   | BMI                   | S4SF                  | AEE <sub>sd</sub> |
|-------------------|------|-----------------------|-----------------------|-----------------------|-------------------|
| EV                | /    | 0.76                  | 0.81                  | 0.36                  | 0.94              |
| WHR               | 0.76 | /                     | $4.37 \times 10^{-5}$ | $5.44 \times 10^{-4}$ | 0.46              |
| BMI               | 0.81 | $4.37 \times 10^{-5}$ | /                     | 0                     | 0.97              |
| S4SF              | 0.36 | $5.44 \times 10^{-4}$ | 0                     | /                     | 0.49              |
| AEE <sub>sd</sub> | 0.94 | 0.46                  | 0.97                  | 0.49                  | /                 |

EV = eveningness in energy intake. WHR = waist to hip ratio. BMI = body mass index. S4SF = sum of 4 skinfolds. AEE<sub>sd</sub> = active energy expenditure during school days.

**Table S9.** Result of the GEE method which included socio-economic status (SES), total daily energy intake (TDEI), gender and age as covariates.

| Source                    | Wald Chi-Square | Significance |
|---------------------------|-----------------|--------------|
| Age                       | 0.342           | 0.559        |
| Gender                    | 2.105           | 0.147        |
| TDEI                      | 0.071           | 0.790        |
| SES                       | 1.012           | 0.312        |
| Age*Gender                | 1.340           | 0.247        |
| Age * TDEI                | 0.425           | 0.809        |
| Age * SES                 | 1.012           | 0.315        |
| Gender * TDEI             | 1.731           | 0.188        |
| Gender * SES              | 0.599           | 0.439        |
| Age * Gender * TDEI       | 0.849           | 0.654        |
| Age* Gender * SES         | 2.069           | 0.150        |
| Age * TDEI * SES          | 0.786           | 0.675        |
| Gender * TDEI * SES       | 2.047           | 0.152        |
| Age * Gender * TDEI * SES | 1.365           | 0.505        |

Dependent Variable: eveningness (EV)

**Table S10.** Result of the GEE method which included the relation between covariates (socio-economic status (SES), total daily energy intake (TDEI), gender and age) and anthropometric characteristics (waist to hip ratio (WHR), body mass index (BMI) and sum of 4 skinfolds (S4SF)).

| Source        | Wald Chi-Square | Significance |
|---------------|-----------------|--------------|
| WHR           | 4.933           | 0.026        |
| BMI           | 4.078           | 0.043        |
| S4SF          | 1.315           | 0.252        |
| SES * WHR     | 11.681          | 0.020        |
| SES * BMI     | 10.637          | 0.031        |
| SES * S4SF    | 1.379           | 0.848        |
| Gender * WHR  | 0.005           | 0.944        |
| Gender * BMI  | 0.834           | 0.361        |
| Gender * S4SF | 0.023           | 0.880        |
| Age * WHR     | 0.774           | 0.379        |
| Age * BMI     | 1.951           | 0.162        |
| Age * S4SF    | 1.092           | 0.296        |
| TDEI * WHR    | 0.010           | 0.921        |
| TDEI * BMI    | 0.776           | 0.378        |
| TDEI * S4SF   | 0.003           | 0.956        |
| TDEI * SES    | 7.111           | 0.213        |

Dependent Variable: eveningness (EV)
